# Supplementary material
Source: publisher figshare collection journal article supplement (https://acs.figshare.com/ndownloader/files/22248423)
Supplement: Supplementary file 1 [file 22248423]

# Supporting Information

## A General in Situ Deposition Strategy for Synthesis of Janus Composite Fabrics with $\text{Co}(\text{CO}_3)_{0.5}\text{OH}\cdot 0.11\text{H}_2\text{O}$ Nanoneedles for Oil-Water Separation

Luyang Hu,<sup>\*,†</sup> Yuheng Liu,<sup>†</sup> Zhidan Wang,<sup>†</sup> Yufeng Zhou,<sup>‡</sup> Yumin Zhang,<sup>‡</sup> Yin Li,<sup>†</sup> and Benxia Li<sup>#</sup>

<sup>†</sup>*School of Materials Science and Engineering, Anhui University of Science & Technology, Huainan, 232001, China.*

<sup>‡</sup>*National Key Laboratory of Science and Technology on Advanced Composites in Special Environment, Harbin, 150001, China.*

<sup>#</sup>*Department of Chemistry, College of Science, Zhejiang Sci-Tech University, Hangzhou, 310018, China.*

\*Corresponding Author: [huluyang@gmail.com](mailto:huluyang@gmail.com)

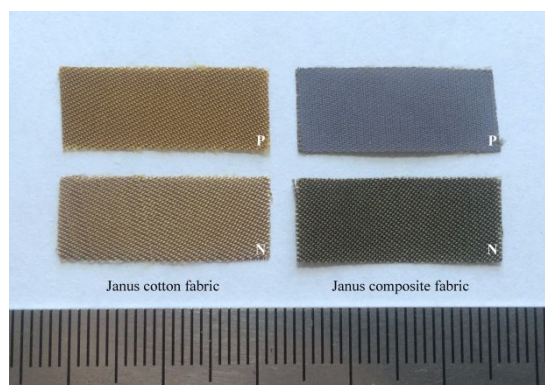

**Figure S1.** Optical images of the hydrophilic side (P) and the hydrophobic side (N). Left: Janus cotton fabric, Right: Janus composite fabric.

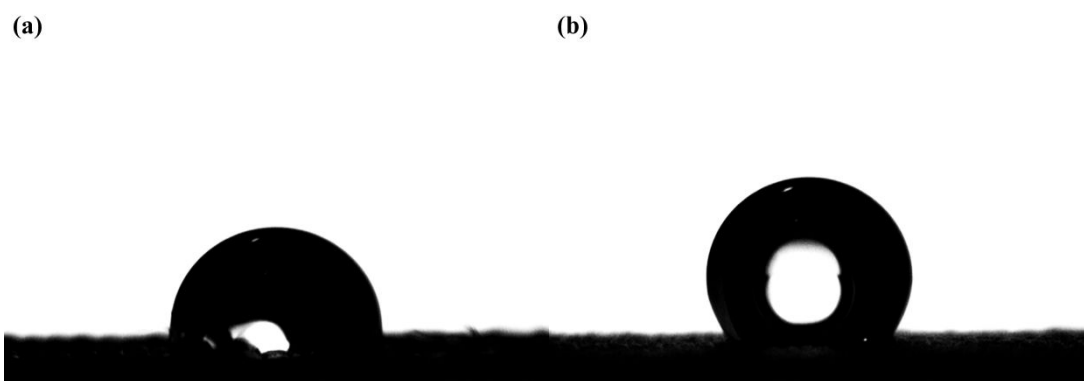

**Figure S2.** The initial contact angles for both sides of the Janus cotton fabric. a)  $85^\circ$  for the hydrophilic side and b)  $119^\circ$  for the hydrophobic side.

(a)

(b)

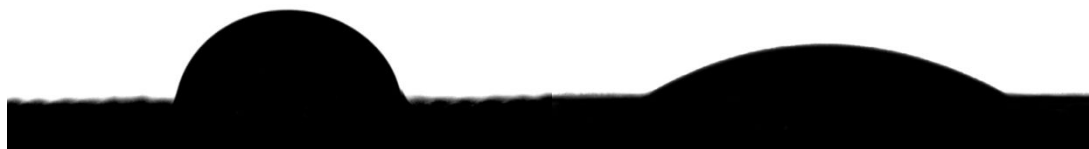

**Figure S3.** The initial contact angles for the hydrophilic side of a) Janus cotton fabric and b) corresponding Janus composite fabric. Oxidation time: 2 h.

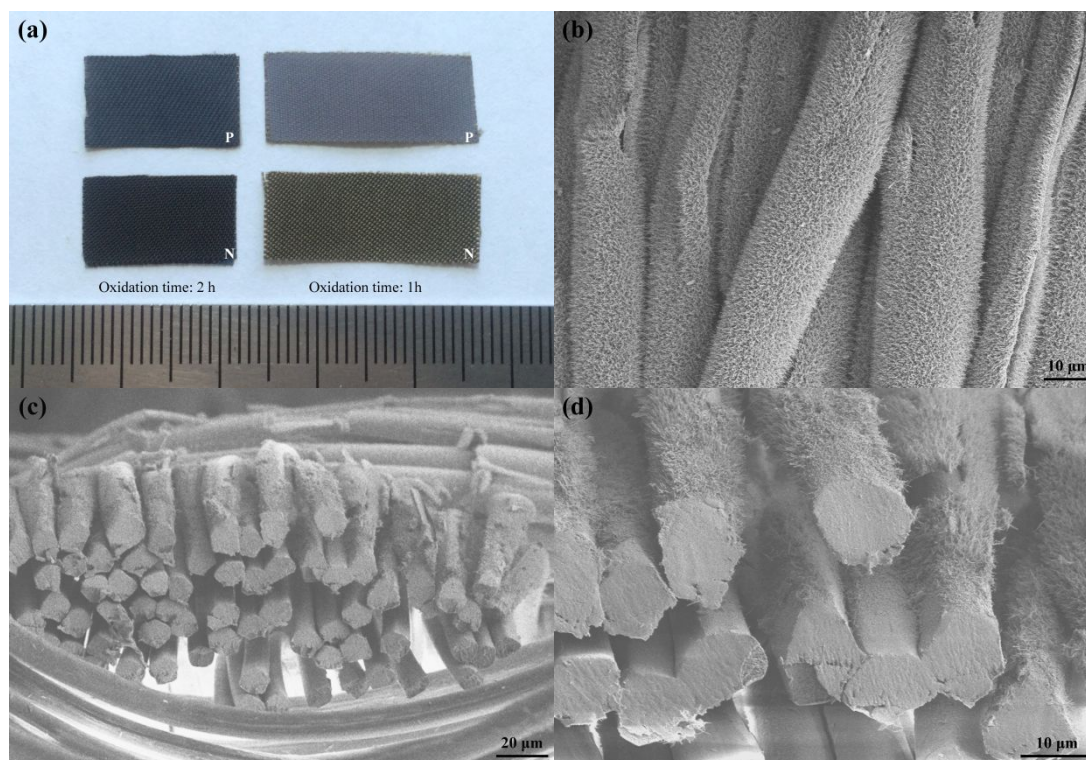

**Figure S4.** a) Photograph images of the Janus composite fabrics for different oxidation time. b) top-view image and c) and d) side-view images of the Janus composite fabric with 2 h oxidation time.

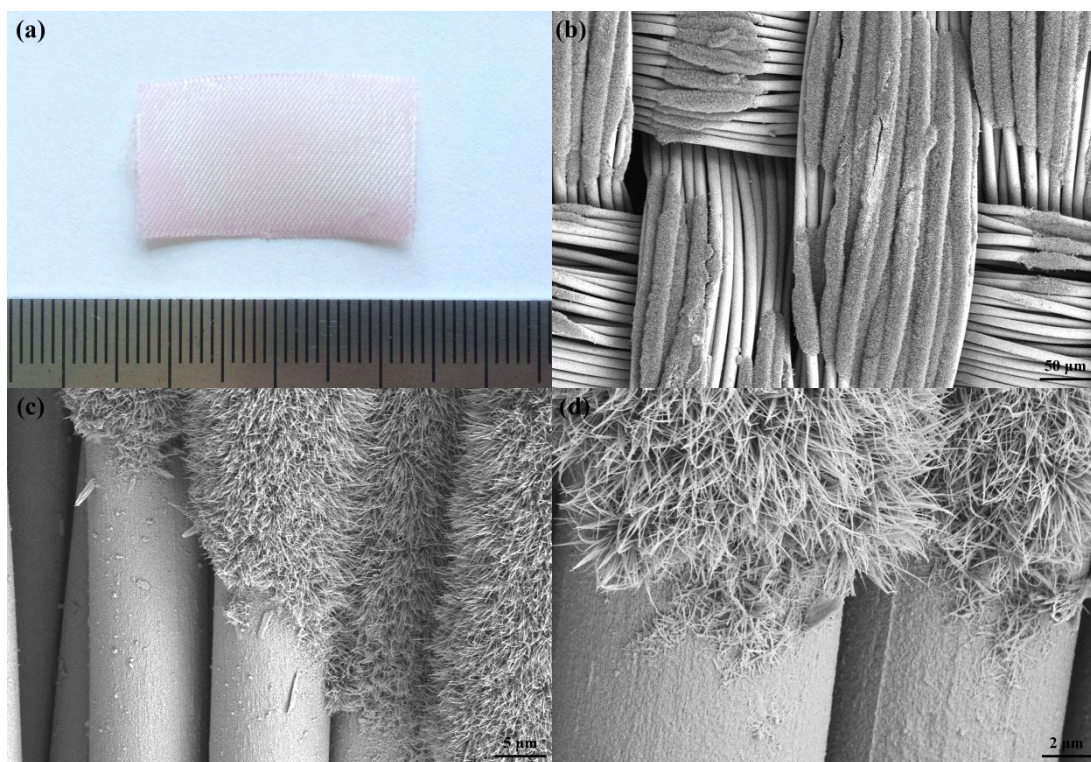

**Figure S5.** a) Photograph image of the composite fabric. b), c) and d) SEM images of the composite fabric.

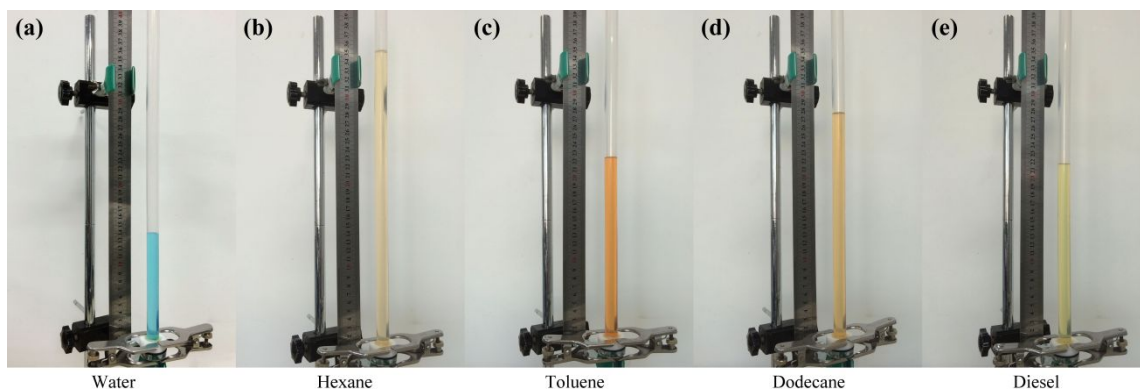

**Figure S6.** The height of a) water column, b) hexane column, c) toluene column, d) dodecane column and f) diesel column supported by the Janus composite fabric.

## Movie Captions

Movie S1: Dynamic behavior of a water droplet on the Janus composite fabric with 1 h oxidation time.

Movie S2: Dynamic behavior of a water droplet on the Janus composite fabric with 2 h oxidation time.

Movie S3: The transmission process of dichloromethane through the Janus composite fabric and the pristine cotton fabric. The hydrophilic side of Janus composite fabric is fixed upward.

Movie S4: The transmission process of dichloromethane through the Janus composite fabric with oil-broken water channel and the pristine cotton fabric. The hydrophilic side of Janus composite fabric with oil-broken water channel is fixed upward.

Movie S5: The transmission process of water through the Janus composite fabric and the pristine cotton fabric. The hydrophobic side of Janus composite fabric is fixed upward.

Movie S6: The separation process of light oil-water mixture. The hydrophobic side of Janus composite fabric is fixed upward.

Movie S7: The separation process of heavy oil-water mixture. The hydrophilic side of Janus composite fabric is fixed upward.

Movie S8: The continuous oil-water separation process by T-shape apparatus.
